# Supplementary material for: Admixture of evolutionary rates across a butterfly hybrid zone
Source: eLife journal article supplement (doi:10.7554/elife.78135), 2022-06-15
Supplement: fig2-data5 [file Figure_2_Source_Data_5_SampleInformation.xlsx]

## Sheet: Sheet1
Sample name	NCBI accession number	Current taxonomy name	Name in the manuscript	Locality	Collecting date	Sex	Note
TXSC20180711006	SAMN21542929	Papilio maackii han	Papilio maackii	XY	Jul-11-2018	M	Sequenced in this project
TXSC20180711011	SAMN21542930	Papilio maackii han	Papilio maackii	XY	Jul-11-2018	M	Sequenced in this project
TXSC20180713001	SAMN21542931	Papilio maackii han	Papilio maackii - hybrid	BJ	Jul-13-2018	M	Sequenced in this project
TXSC20180727005	SAMN21542932	Papilio maackii han	Papilio maackii	YA	Jul-27-2018	M	Sequenced in this project
TXSC20180713007	SAMN21542933	Papilio maackii albosyfanius	Papilio syfanius - hybrid	WN	Jul-13-2018	M	Sequenced in this project
TXSC20180713008	SAMN21542934	Papilio maackii albosyfanius	Papilio syfanius - hybrid	WN	Jul-13-2018	M	Sequenced in this project
TXSC20180714006	SAMN21542935	Papilio maackii albosyfanius	Papilio syfanius - hybrid	WN	Jul-14-2018	M	Sequenced in this project
TXSC20180714008	SAMN21542936	Papilio maackii albosyfanius	Papilio syfanius - hybrid	WN	Jul-14-2018	M	Sequenced in this project
TXSC20180718001	SAMN21542937	Papilio maackii albosyfanius	Papilio syfanius	KM	Jul-18-2018	M	Sequenced in this project
TXSC20180718009	SAMN21542938	Papilio maackii albosyfanius	Papilio syfanius	KM	Jul-18-2018	M	Sequenced in this project
TXSC20180718016	SAMN21542939	Papilio maackii albosyfanius	Papilio syfanius	KM	Jul-18-2018	M	Sequenced in this project
TXSC20180714007	SAMN21542940	Papilio arcturus	Papilio arcturus	WN	Jul-14-2018	M	Sequenced in this project
TXSC20180821006	SAMN21542941	Papilio dialis	Papilio dialis	NB	Aug-21-2018	M	Sequenced in this project
Reference genome 1		Papilio bianor	Papilio bianor	KM			Assembled in this paper: https://doi.org/10.1093/gigascience/giz128
Reference genome 2		Papilio xuthus	Papilio bianor	KM			The alignment between P. xuthus and P. bianor reference genomes is already available at: https://doi.org/10.1093/gigascience/giz128
Locality	Latitude	Longitude	Elevation (m)	Detail
YA	30.0617	102.988	1157	Bifeng Valley, Ya'an, Sichuan Province, China
XY	28.2965	105.533	329	Huagaoxi, Xuyong County, Luzhou, Sichuan Province, China
BJ	27.3181	105.271	1743	Wenbi Mountain, Bijie, Guizhou Province, China
WN	26.7553	104.432	2358	Jinzhongzhen, Weining County, Bijie, Guizhou Province, China
KM	25.0883	102.808	2038	Huanglongqing, Kunming, Yunnan Province, China
NB	29.7991	121.253	200	Wulongtan, Ningbo, Zhejiang Province, China
