# Supplementary material for: Admixture of evolutionary rates across a butterfly hybrid zone
Source: eLife journal article supplement (doi:10.7554/elife.78135), 2022-06-15

—  $r \sim F_{ST}$  curve  
 ● Simulation

Population with  
slow substitutions

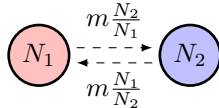

Population with  
fast substitutions

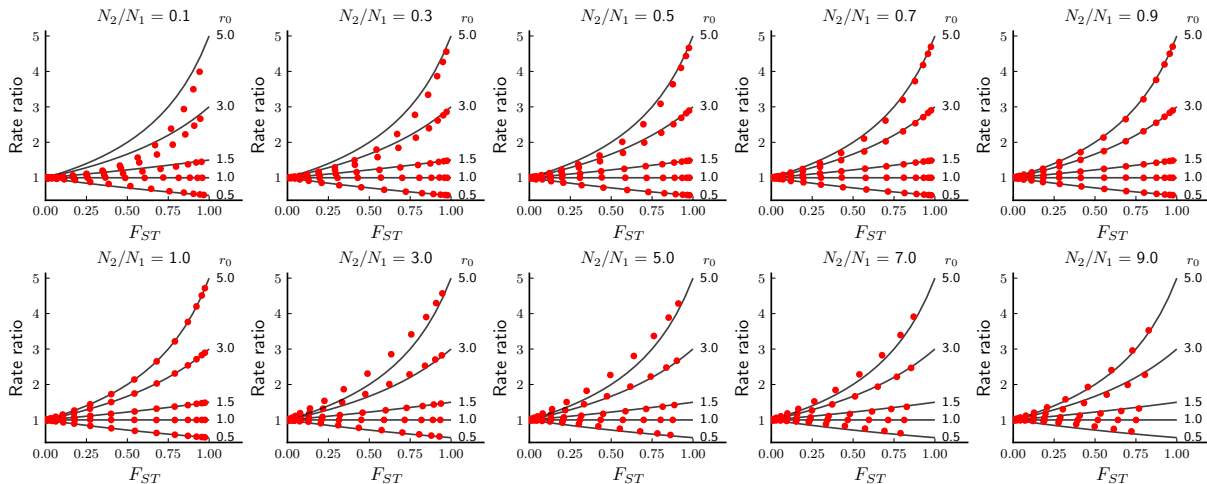

Supplement: supp [file elife-78135-supp-v1.zip]
