# Supplementary material for: Admixture of evolutionary rates across a butterfly hybrid zone
Source: eLife journal article supplement (doi:10.7554/elife.78135), 2022-06-15
Supplement: supp [file Figure_5_Source_Data_2_Signed_Rank_Test.xlsx]

## Sheet: Sheet1
Results of the Wilcoxon signed-rank test. For each pair of individuals (i,j), where i is P. maackii and j is P. syfanius, the test compares if branches leading to i (L_i) is significantly longer than branches leading to j (L_j). L_i and L_j are paired data (4776 measurements in total). p-values are single-sided such that rejecting the null hypothesis (Median(L_i-L_j)<=0) suggests Median(L_i-L_j)>…
Individual pair (i,j)	Statistic	p-value
10,4	7703327	4.68578e-98
10,5	7711927	7.00402e-99
10,8	7786921	3.10758e-106
10,2	8466401	4.34337e-185
10,3	7998577	1.9603e-128
10,7	8097279	1.61614e-139
10,9	8040167	4.78447e-133
1,4	8107709	1.0283e-140
1,5	8125705	8.54962e-143
1,8	8192570	1.17198e-150
1,2	8845358	1.20233e-238
1,3	8385222	1.65588e-174
1,7	8501824	8.27365e-190
1,9	8435804	4.58701e-181
11,4	8619969	5.77927e-206
11,5	8674639	1.14269e-213
11,8	8695345	1.26607e-216
11,2	9292816	1.0203101578327E-310
11,3	8.90642e+06	6.44033e-248
11,7	9011758	2.46948e-264
11,9	8928703	2.40246e-251
6,4	8691441	4.58045e-216
6,5	8690225	6.84599e-216
6,8	8750724	1.25445e-224
6,2	9326087	0
6,3	8968414	1.62347e-257
6,7	9.01339e+06	1.36115e-264
6,9	9007066	1.37672e-263
Individual	Sample name
1	TXSC20180711006
2	TXSC20180714006
3	TXSC20180714008
4	TXSC20180718016
5	TXSC20180718009
6	TXSC20180713001
7	TXSC20180713007
8	TXSC20180718001
9	TXSC20180713008
10	TXSC20180727005
11	TXSC20180711011
