# Supplementary figures and images for: Admixture of evolutionary rates across a butterfly hybrid zone
Source: eLife journal article supplement (doi:10.7554/elife.78135), 2022-06-15

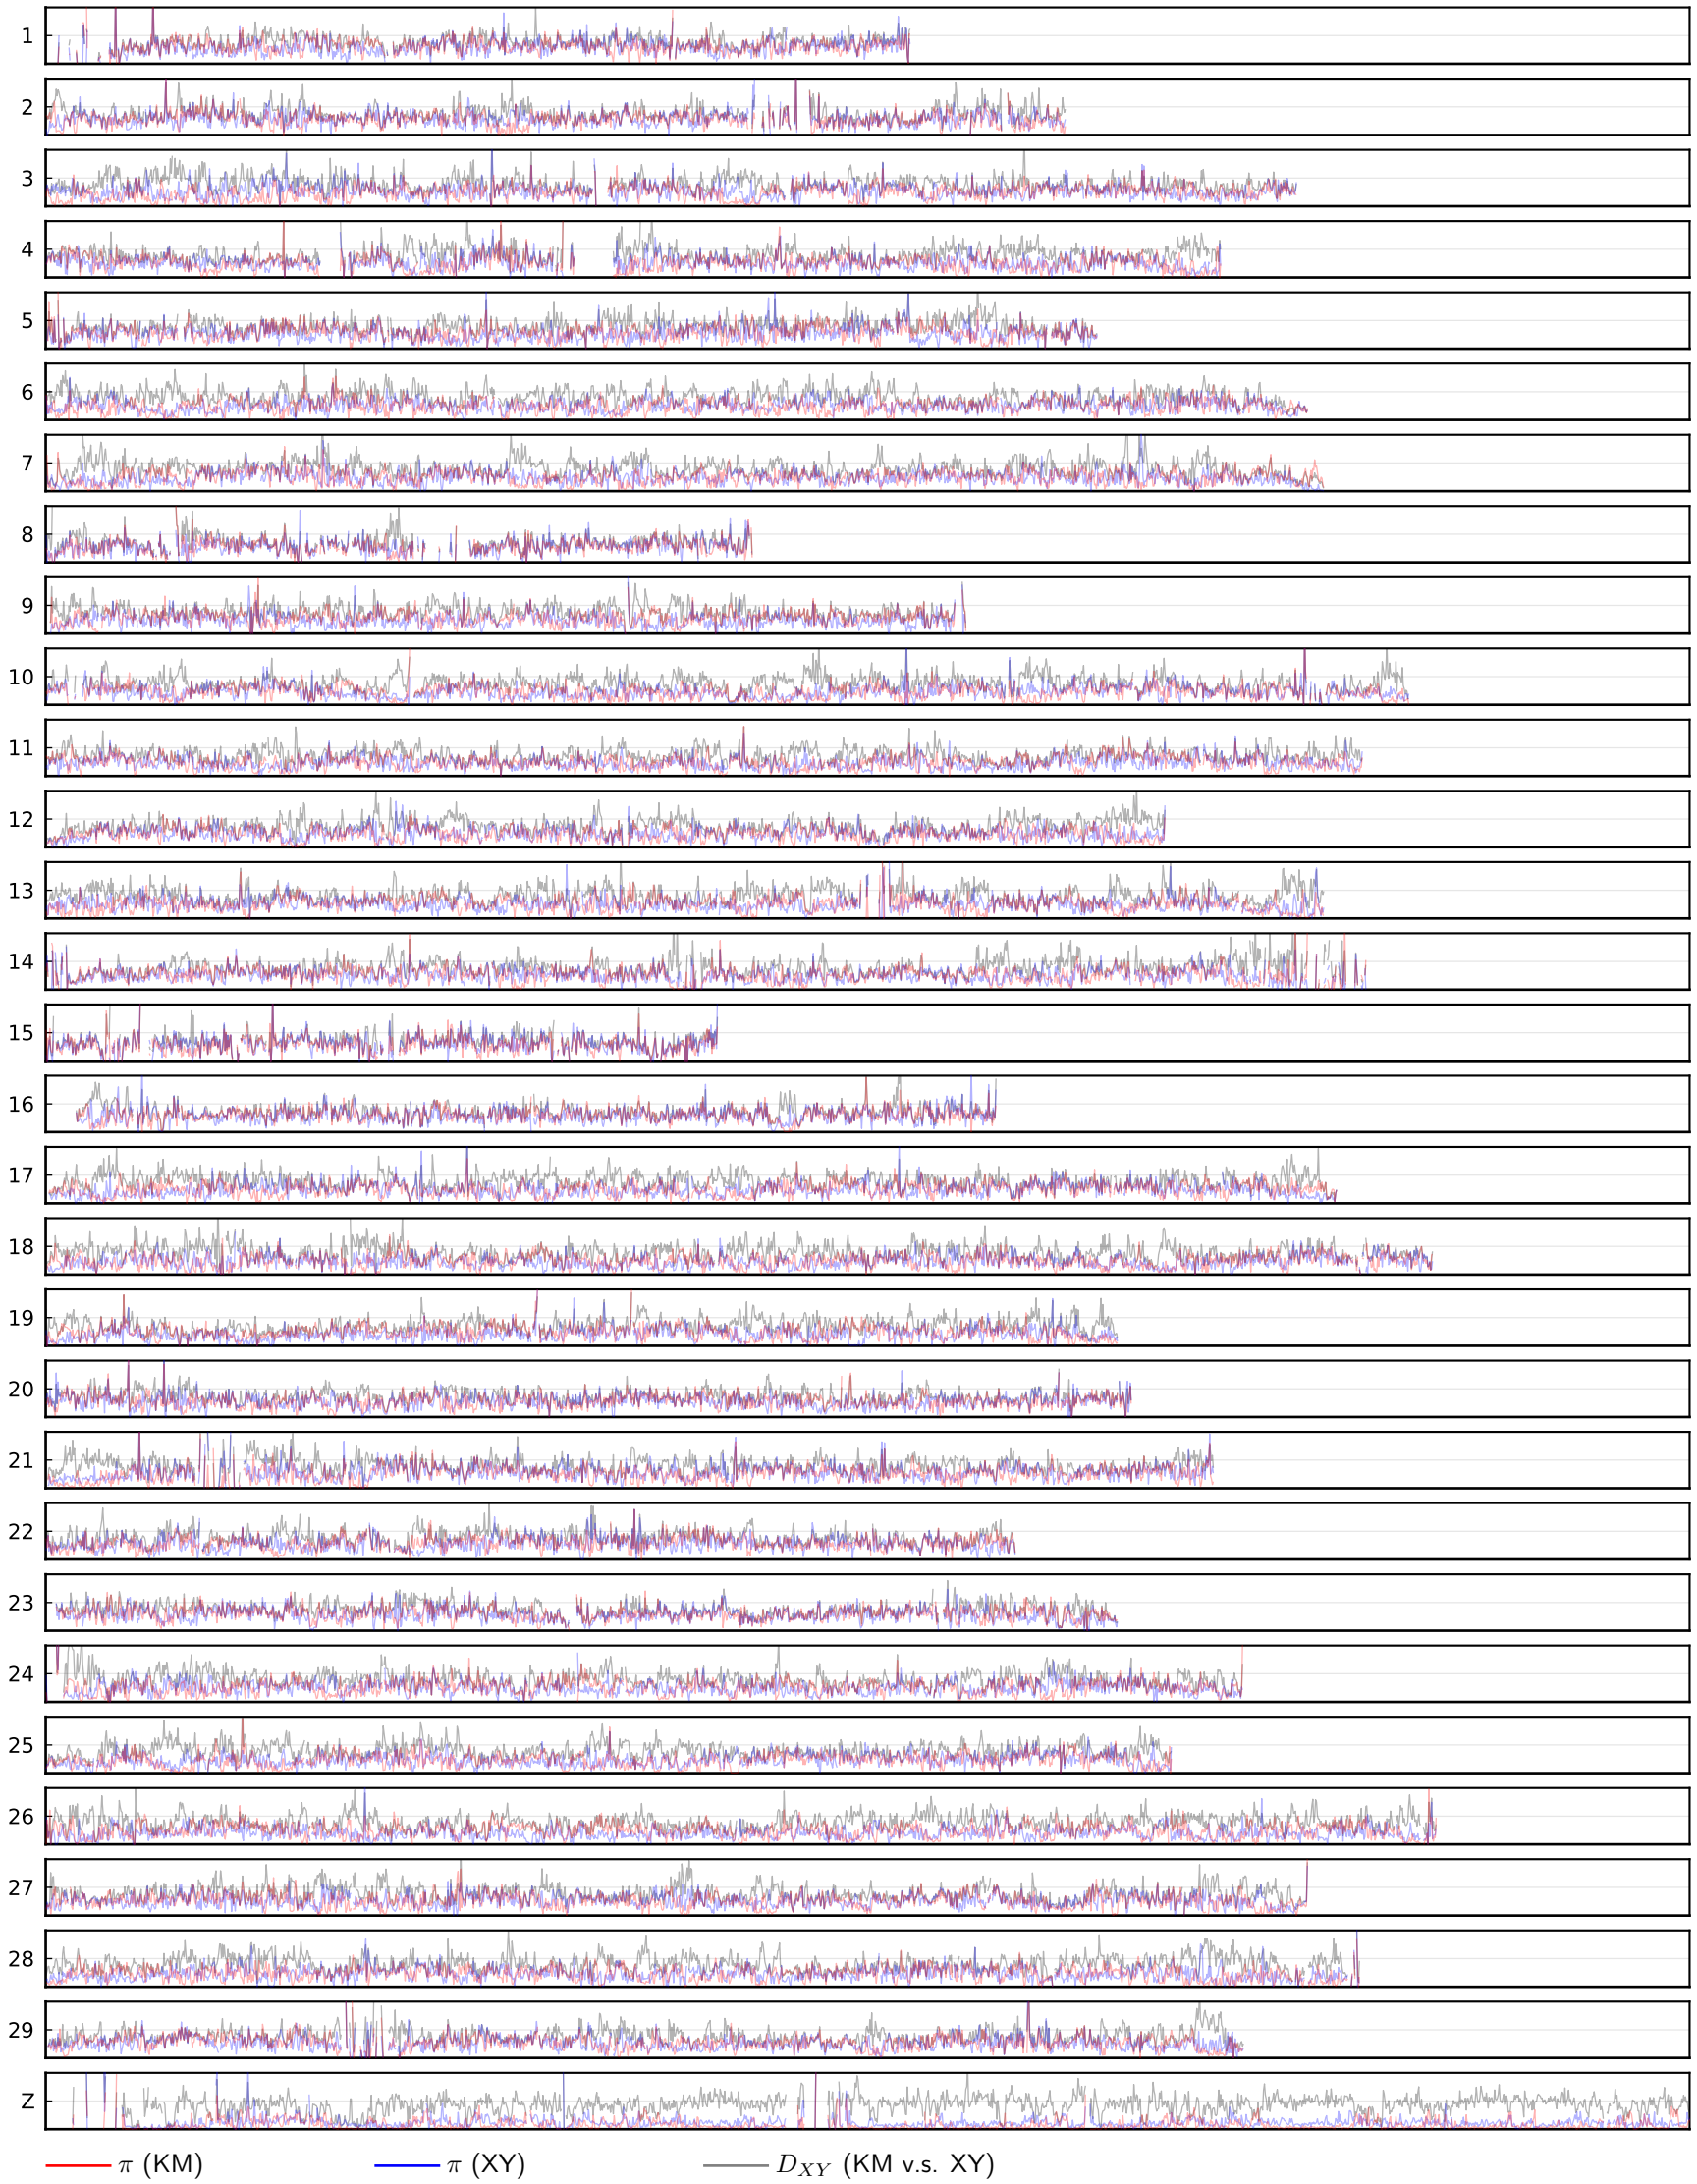

Supplement: supp [file elife-78135-supp-v1.zip]

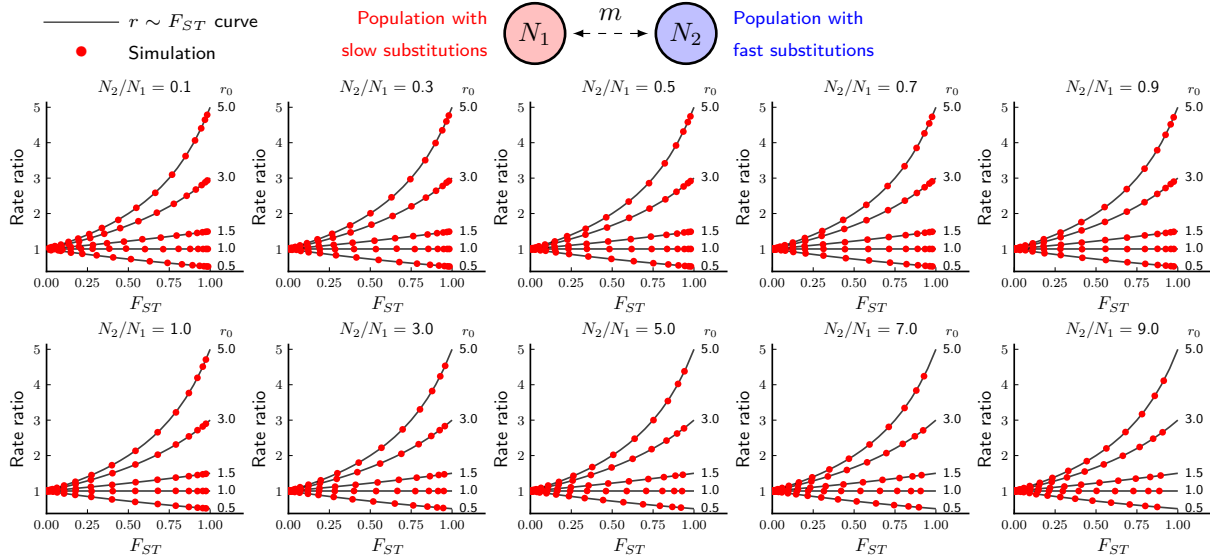

Supplement: supp [file elife-78135-supp-v1.zip]

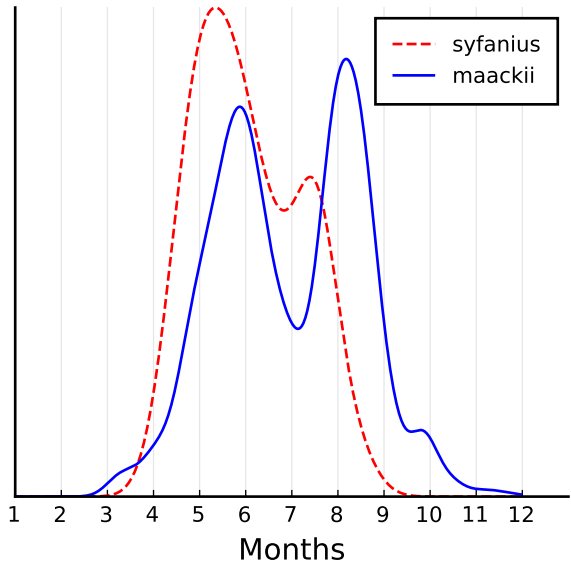

Supplement: supp [file elife-78135-supp-v1.zip]

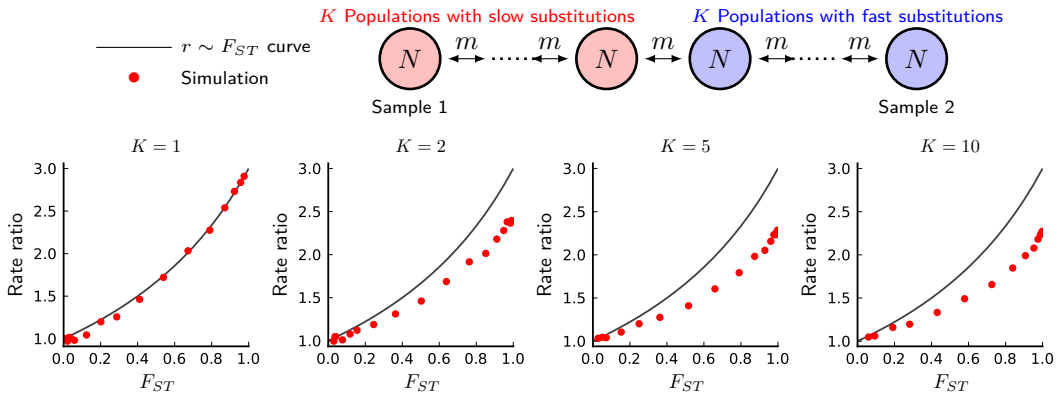

Supplement: supp [file elife-78135-supp-v1.zip]

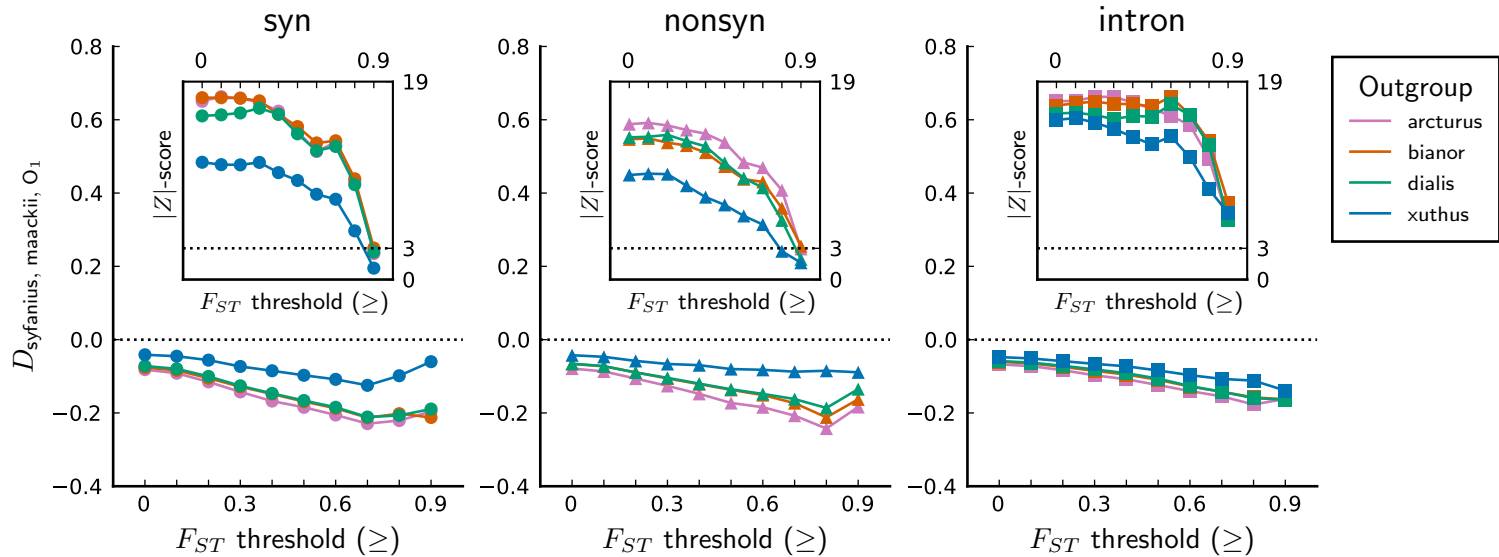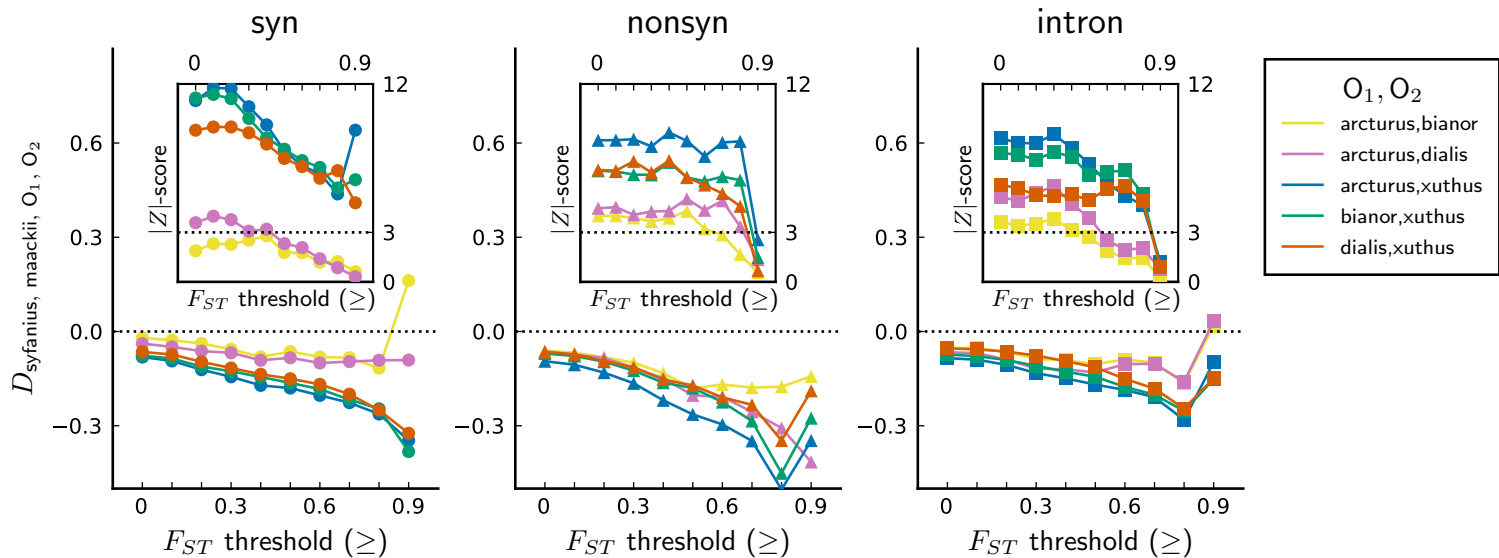

Supplement: supp [file elife-78135-supp-v1.zip]

*P. maackii*  
*ssp. shimogorii*

*P. syfanius*

0 800 km

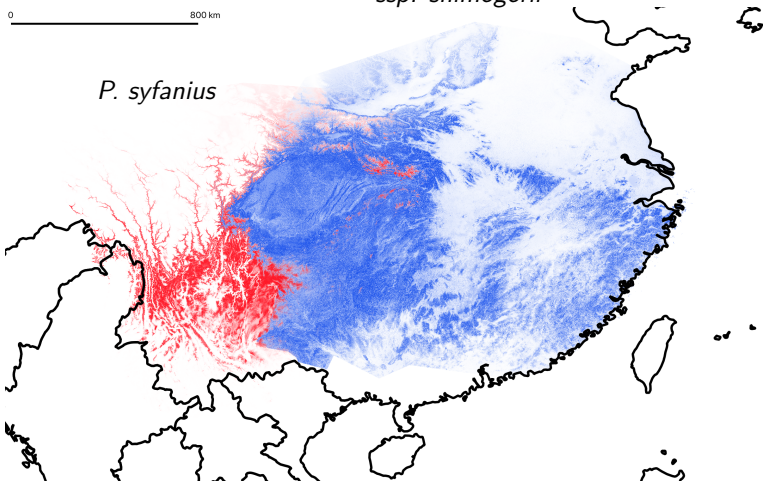

Supplement: supp [file elife-78135-supp-v1.zip]
